# Supplementary material for: Harnessing the Dual Antimicrobial Mechanism of Action with Fe(8-Hydroxyquinoline)3 to Develop a Topical Ointment for Mupirocin-Resistant MRSA Infections
Source: MDPI journal article supplement (doi:10.3390/antibiotics12050886), 2023-05-10
Supplement: s1 [file s1]

## Supporting Information

# Harnessing the Dual Antimicrobial Mechanism of Action with Fe(8-Hydroxyquinoline)<sub>3</sub> to Develop a Topical Ointment for Mupirocin-Resistant MRSA Infections

Nalin Abeydeera <sup>1</sup>, Bogdan M. Benin <sup>2</sup>, Khalil Mudarmah <sup>1,3</sup>, Bishnu D. Pant <sup>1</sup>,  
Guanyu Chen <sup>1</sup>, Woo Shik Shin <sup>2,\*</sup>, Min-Ho Kim <sup>4</sup> and Songping D. Huang <sup>1,\*</sup>

<sup>1</sup> Department of Chemistry and Biochemistry, Kent State University, Kent, OH 44240, USA; nkekiriw@kent.edu (N.A.); kmudarma@kent.edu (K.M.); bpant@kent.edu (B.D.P.); gchen10@kent.edu (G.C.)

<sup>2</sup> Department of Pharmaceutical Sciences, College of Pharmacy, Northeast Ohio Medical University, Rootstown, OH 44272, USA; bbenin@neomed.edu

<sup>3</sup> Department of Chemistry, Jazan University, Jazan 45142, Saudi Arabia

<sup>4</sup> Department of Biological Sciences, Kent State University, Kent, OH 44240, USA; mkim15@kent.edu

\* Correspondence: wshin@neomed.edu (W.S.S.); shuang1@kent.edu (S.D.H.)

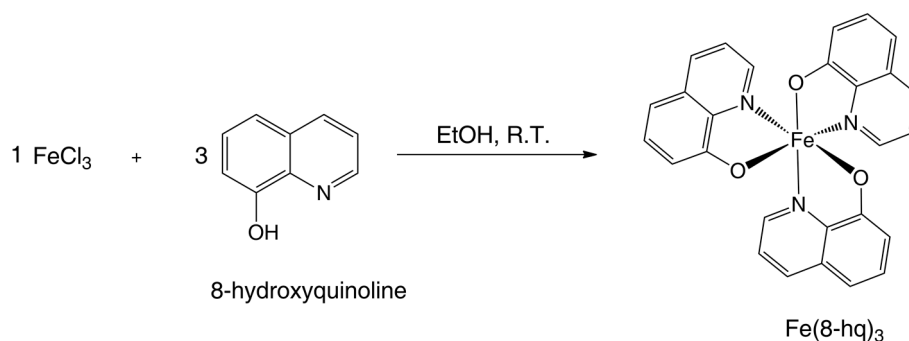

**Scheme S1.** Synthetic procedure for the preparation of Fe(8-hq)<sub>3</sub>.

### Characterization Studies

**Table S1.** Elemental analysis results of Fe(8-hq)<sub>3</sub>.

| Elements     | C <sub>27</sub> H <sub>18</sub> O <sub>3</sub> N <sub>3</sub> Fe |                |
|--------------|------------------------------------------------------------------|----------------|
|              | Calculated %                                                     | Experimental % |
| Carbon (C)   | 66.41                                                            | 66.11          |
| Hydrogen (H) | 3.72                                                             | 3.71           |
| Nitrogen (N) | 8.61                                                             | 8.73           |
| Iron (Fe)    | 11.44                                                            | 11.52          |

Empirical formula related to experimental values of the Fe(8-hq)<sub>3</sub> complex gives the exact molecular formula and experimental values are closer to the calculated values. This results undoubtedly confirmed the identity of the obtained product to be Fe(8-hq)<sub>3</sub> with purity >98%.

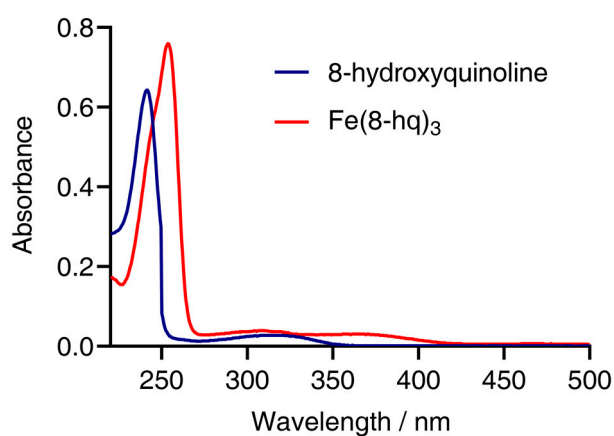

**Figure S1.** UV-vis spectra of Fe(8-hq)<sub>3</sub> and 8-hydroxyquinoline in chloroform.

UV-visible spectra of 8-hydroxyquinoline and  $\text{Fe(8-hq)}_3$  were recorded in chloroform showed significant differences between the absorption peaks of 8-hydroxyquinoline and  $\text{Fe(8-hq)}_3$  complex. Since ligand bear conjugated systems,  $\pi-\pi^*$  transition is possible. In  $\text{Fe(8-hq)}_3$  complex, the wavelengths have shifted towards the longer wavelength range (bathochromic shift) because of changes in the conjugated electron system due to the formation of metal-ligand bonds.

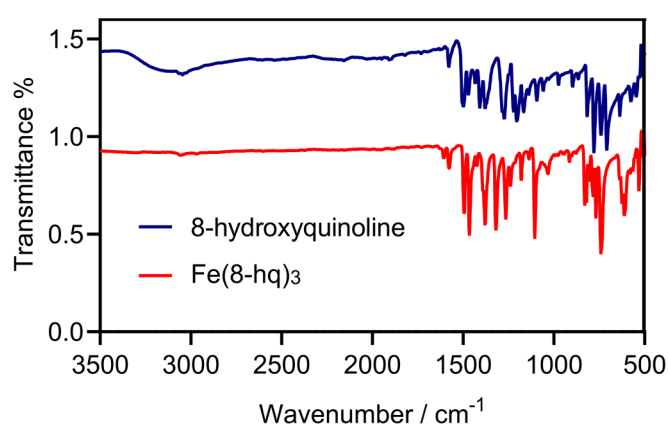

**Figure S2.** FT-IR spectra of  $\text{Fe(8-hq)}_3$  and 8-hydroxyquinoline.

The dried metal complex product and ligand were produced, and FT-IR data was acquired. The stretching frequency of the 8-hydroxyquinoline ring (C-N) and the stretching frequency of the 8-hydroxyquinoline ring (C-O) are crucial. These stretching frequencies have changed because of the creation of new metal-ligand connections. Therefore, by measuring the stretching frequency of the same bond, we may determine whether the reaction has occurred. In addition, because of the development of new metal-ligand bonds, the stretching frequency of the C-N and C-O bonds has been changed to a lower frequency range, lowering their strength.

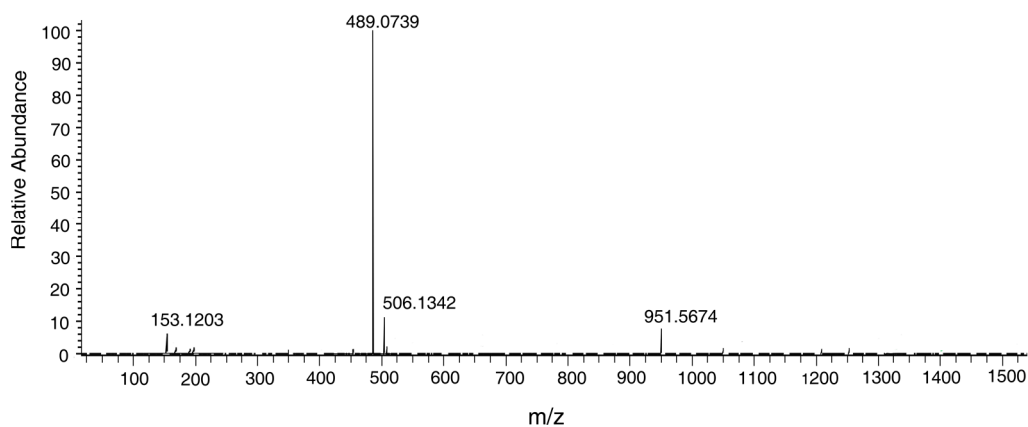

**Figure S3.** ESI/LC-MS trace of the as-synthesized  $\text{Fe(8-hq)}_3$ .

ESI/LC-Mass spectrometry was used to identify the structure and purity of the synthesis product. We observed the appearance of a signal ( $m/z$  of 489.073) which corresponds to  $\text{Fe(8-hq)}_3$  and clearly confirmed the identity of the obtained product to be  $\text{Fe(8-hq)}_3$ .

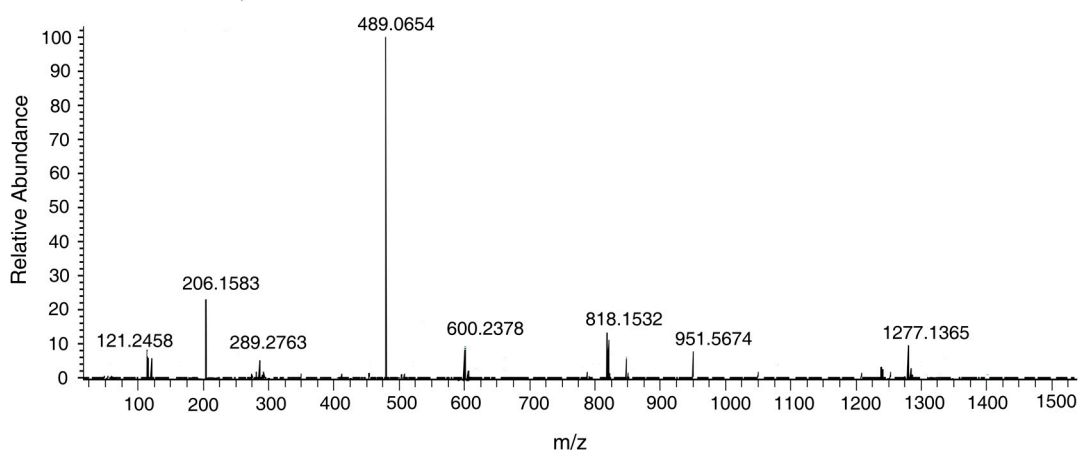

**Figure S4.** ESI/LC-MS trace of the recovered product  $\text{Fe(8-hq)}_3$  after incubating at 37 °C and 180 rpm for 48 hours with the bacterial cell culture medium. When compared to the results shown in **Figure S3**, it confirms the stability of  $\text{Fe(8-hq)}_3$  against the degradation in the cell culture medium or the formation of protein aggregates.



## Biological Assays

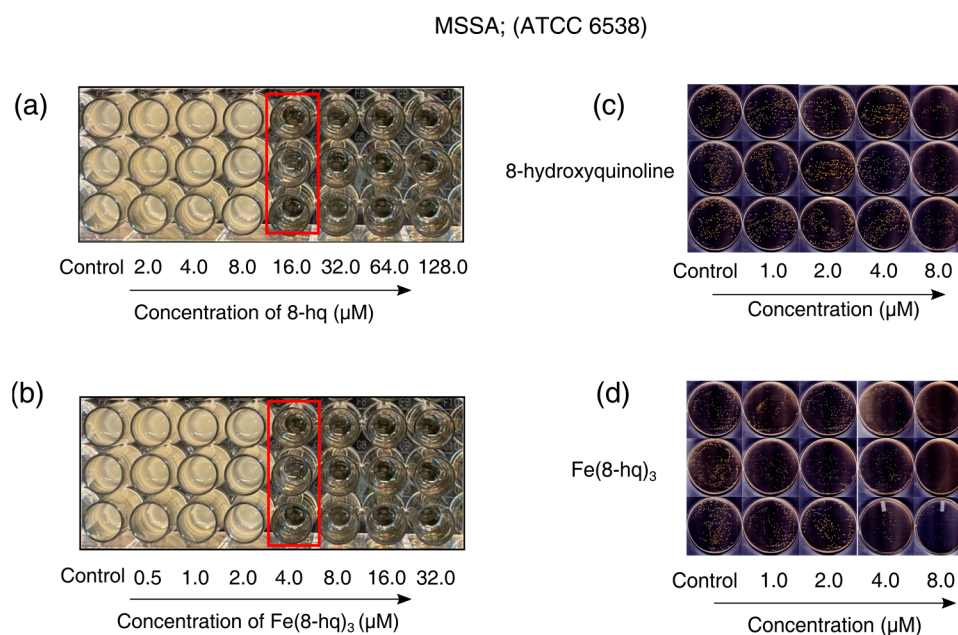

**Figure S5.** Representative images of MIC test of 8-hydroxyquinoline (a),  $\text{Fe}(\text{8-hq})_3$  (b) and representative images of CFU enumeration results (c and d) against MSSA (ATCC 6538).

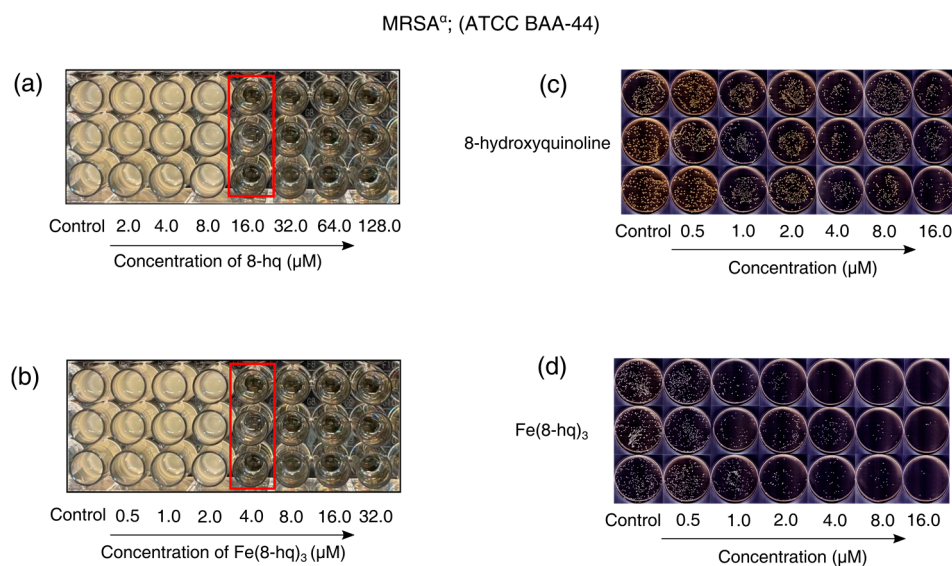

**Figure S6.** Representative images of MIC test of 8-hydroxyquinoline (a),  $\text{Fe}(\text{8-hq})_3$  (b) and representative images of CFU enumeration results (c and d) against MRSA<sup>a</sup> (ATCC BAA-44).

MRSA<sup>β</sup> (USA 300; ATCC BAA-1717)

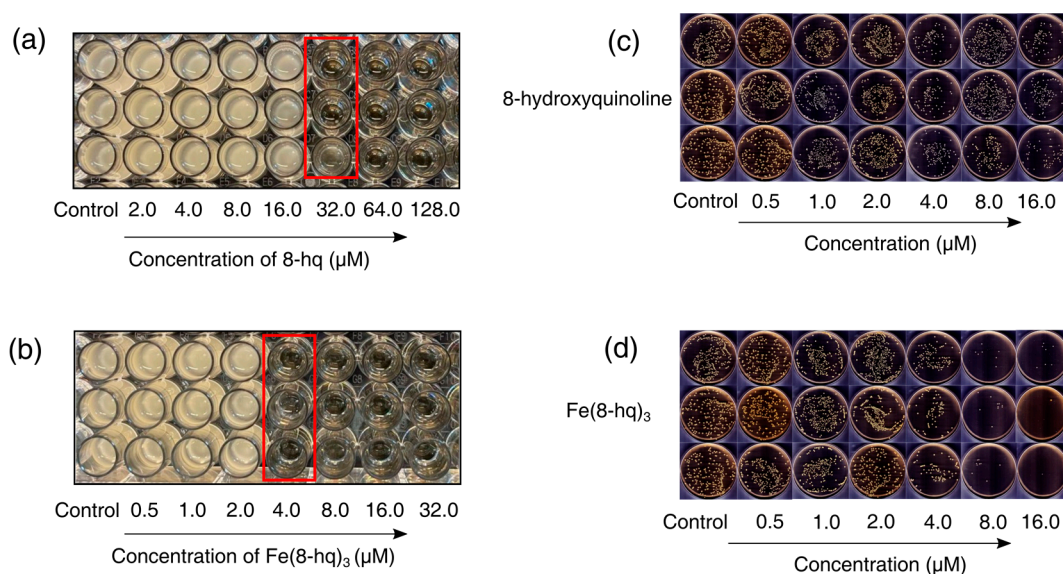

**Figure S7.** Representative images of MIC test of 8-hydroxyquinoline (a),  $\text{Fe}(\text{8-hq})_3$  (b) and representative images of CFU enumeration results (c and d) against MRSA<sup>β</sup> (USA 300; ATCC BAA-1717).

VISA; (ATCC 700699)

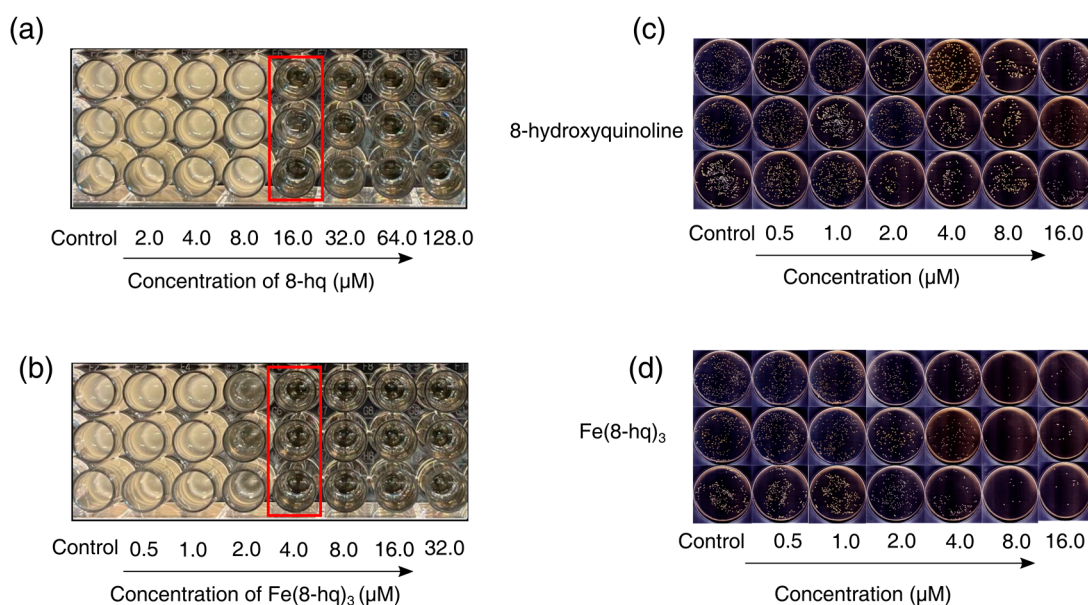

**Figure S8.** Representative images of MIC test of 8-hydroxyquinoline (a),  $\text{Fe}(\text{8-hq})_3$  (b) and representative images of CFU enumeration results (c and d) against VISA (ATCC 700699).

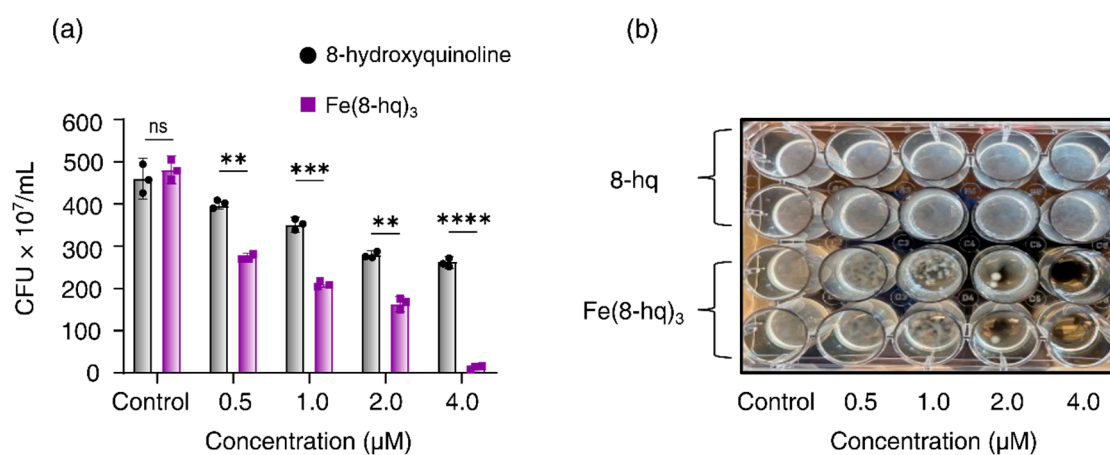

**Figure S9.** Growth-inhibitory effect of Fe(8-hq)<sub>3</sub> in comparison with molar equivalent concentrations of 8-hq in biofilm-derived MRSA<sup>α</sup> bacterial cells (a) and representative images of biofilm-inhibitory results (b) (mean ± s.d, n =3 replicates; \*p < 0.05, \*\*p < 0.01, \*\*\*p < 0.001, \*\*\*\*p < 0.0001, ns = not significant).

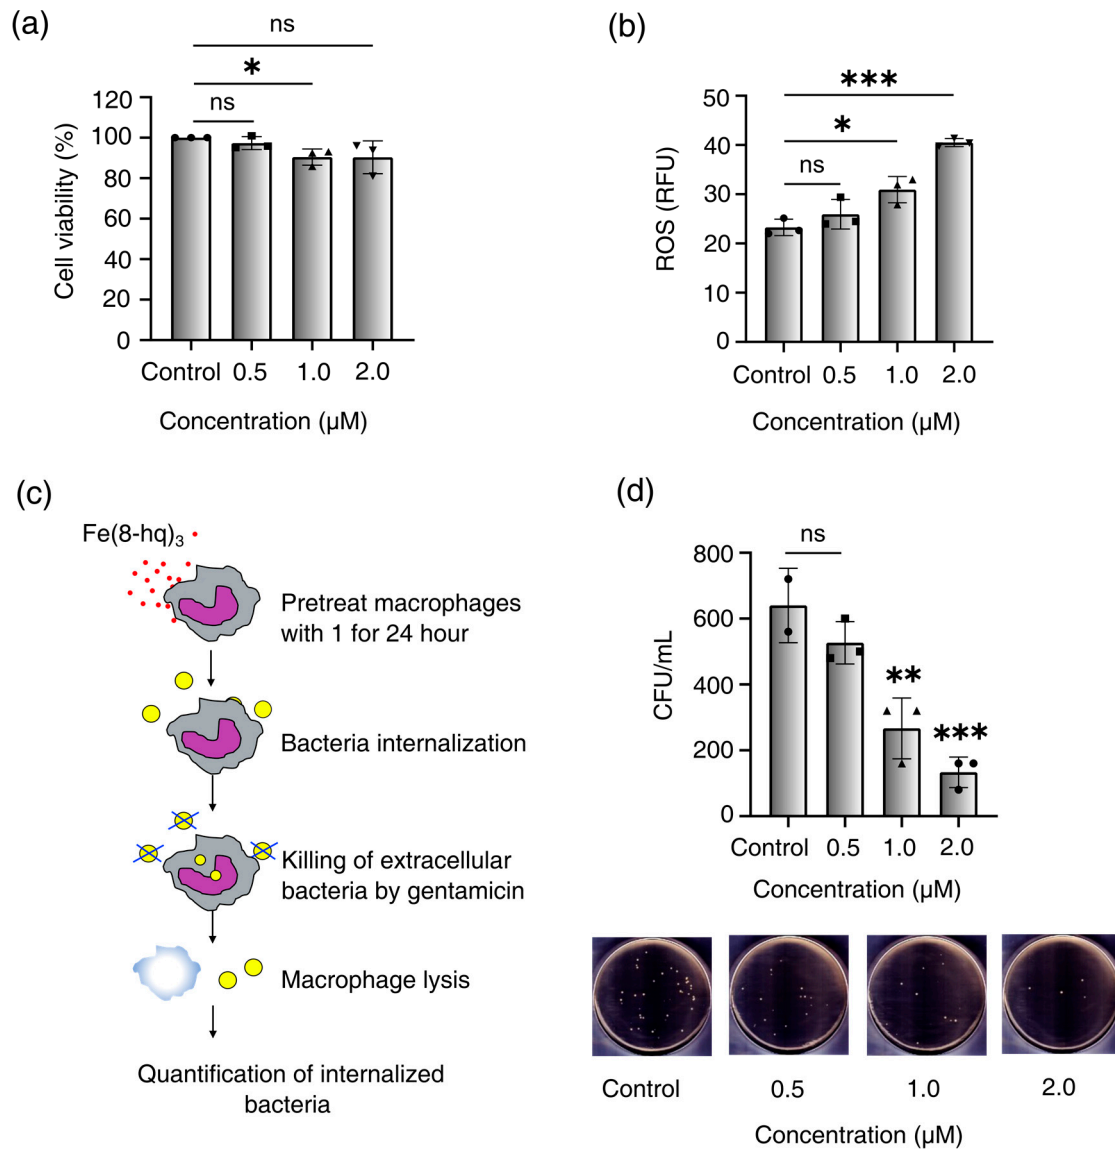

**Figure S10.** The effect of  $\text{Fe(8-hq)}_3$  on the viability of RAW 264.7 cells treated with varying concentrations between 0 and 2  $\mu\text{M}$  for 24 h (a). The quantification of ROS generation in RAW 264.7 cells treated with varying concentration between 0 and 2  $\mu\text{M}$  for 18 h (b). A schematic diagram of the experimental protocol for phagocytosis and killing of intracellular bacteria by an antibiotic protection assay (c). The effect of varying concentrations of  $\text{Fe(8-hq)}_3$  between 0 and 2  $\mu\text{M}$  on the bactericidal activity of RAW 264.7 cells assessed by the antibiotic protection assay (d) (mean  $\pm$  s.d, n =3 replicates; \*p < 0.05, \*\*p < 0.01, \*\*\*p < 0.001 and ns = not significant).



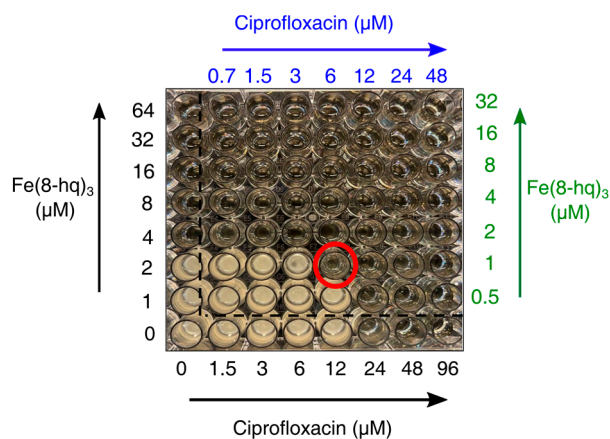

**Figure S11.** Checkerboard assay for  $\text{Fe(8-hq)}_3$  and ciprofloxacin against MRSA<sup>a</sup> with a representative image of MIC assay. The green arrow/font and blue arrow/font indicate the concentration of  $\text{Fe(8-hq)}_3$  and ciprofloxacin, respectively, used for the determination of MIC for the combination of ciprofloxacin and  $\text{Fe(8-hq)}_3$ , where the MIC was determined to be of 6.0  $\mu\text{M}$  of ciprofloxacin in the presence of 1.0  $\mu\text{M}$  of  $\text{Fe(8-hq)}_3$  (red circled-well).

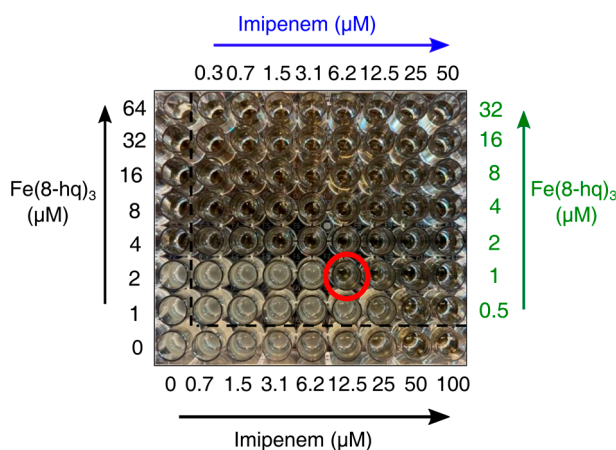

**Figure S12.** Checkerboard assay for  $\text{Fe(8-hq)}_3$  and imipenem against MRSA<sup>a</sup> with a representative image of MIC assay. The green arrow/font and blue arrow/font indicate the concentration of  $\text{Fe(8-hq)}_3$  and imipenem, respectively, used for the determination of MIC for the combination of imipenem and  $\text{Fe(8-hq)}_3$ , where the MIC was determined to be of 6.25  $\mu\text{M}$  of imipenem in the presence of 1.0  $\mu\text{M}$  of  $\text{Fe(8-hq)}_3$  (red circled-well).

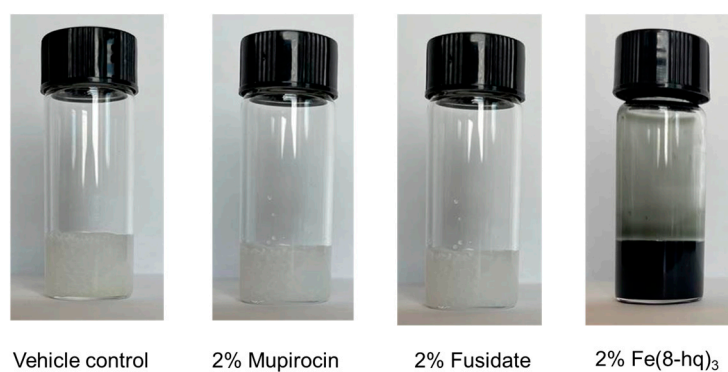

**Figure S13.** Representative images of prepared PEG-based vehicle control, 2% mupirocin, 2% fusidate and 2% Fe(8-hq)<sub>3</sub>.

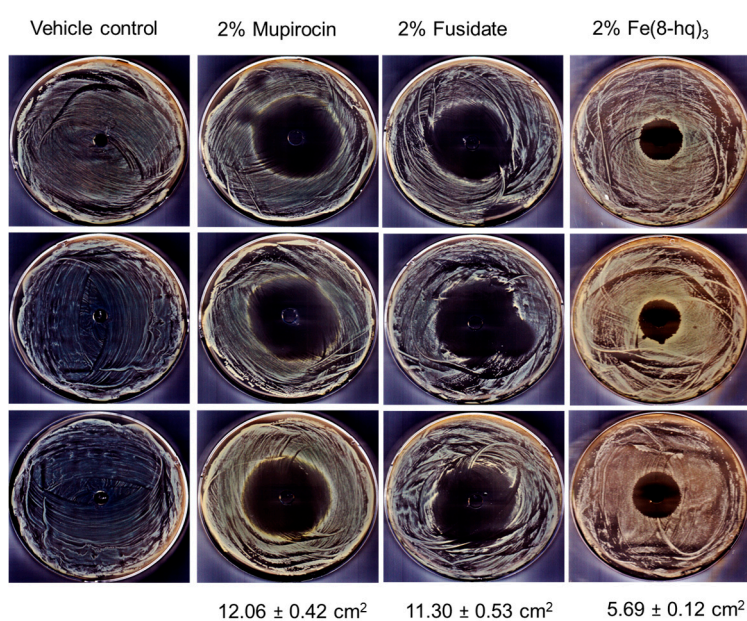

**Figure S14.** Antimicrobial effects of PEG-based ointments containing vehicle control, 2% mupirocin, 2% fusidate, and 2% Fe(8-hq)<sub>3</sub> toward wild type MRSA<sup>a</sup>.

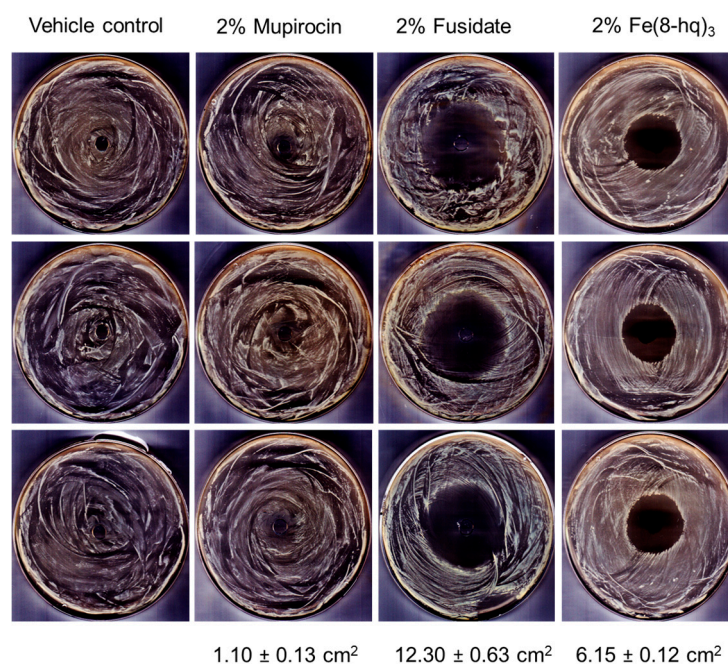

**Figure S15.** Antimicrobial effects of PEG-based ointments containing vehicle control, 2% mupirocin, 2% fusidate, and of 2% Fe(8-hq)<sub>3</sub> toward high-level mupirocin resistant MRSA<sup>α</sup>; MRSA<sup>(mupR)</sup>.

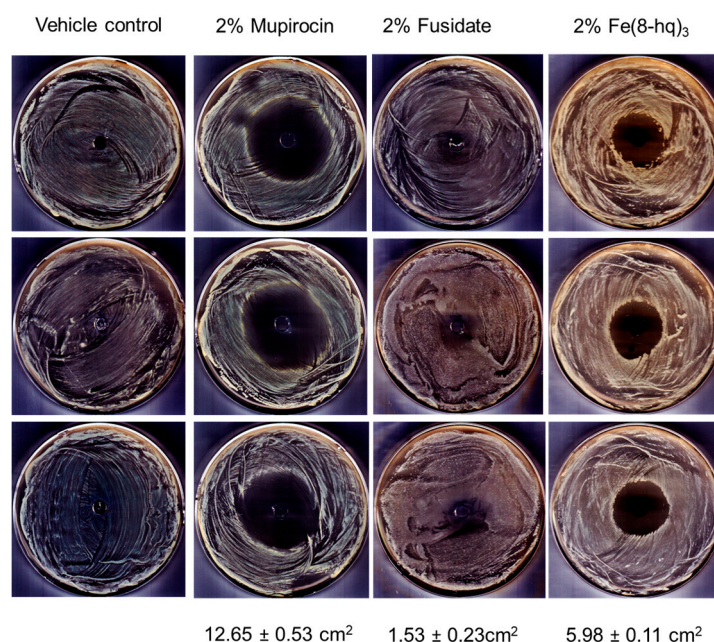

**Figure S16.** Antimicrobial effects of PEG based ointments containing vehicle control, 2% mupirocin, 2% fusidate, and of 2% Fe(8-hq)<sub>3</sub> toward high-level fusidate-resistant MRSA<sup>α</sup>; MRSA<sup>(fusR)</sup>.



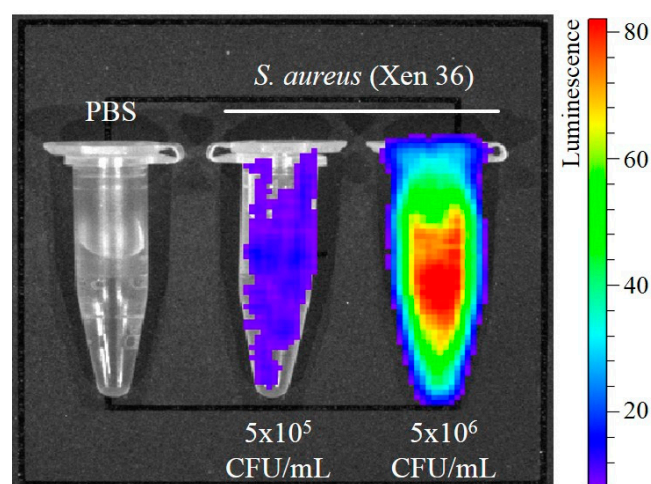

**Figure S17.** IVIS imaging of *S. aureus* (Xen 36) for the number of CFU optimization before mice infection.

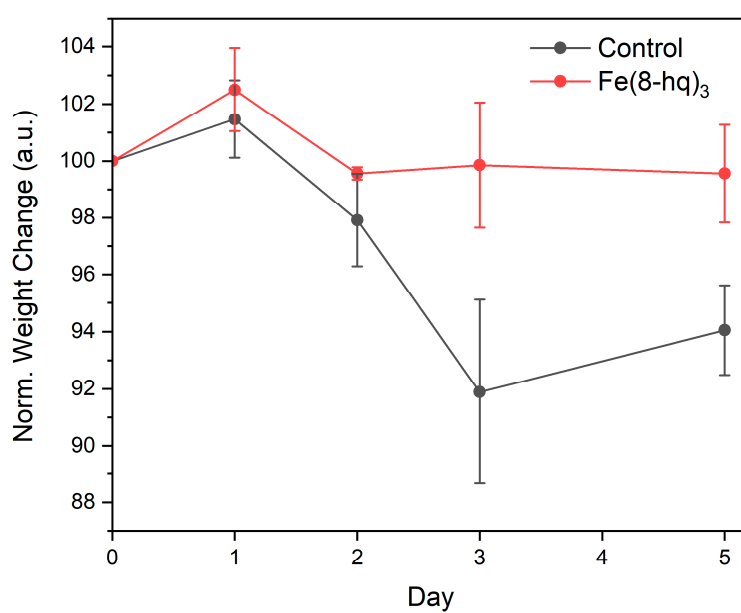

**Figure S18.** The group averaged mouse weight following either vehicle control or Fe(8-hq)<sub>3</sub> treatment.
